# Supplementary material for: Mesenchymal Stem Cell-Derived Extracellular Vesicles as Proposed Therapy in a Rat Model of Cerebral Small Vessel Disease
Source: MDPI journal article supplement (doi:10.3390/ijms231911211), 2022-09-23
Supplement: s1 [file s1]

# Supplementary Materials:

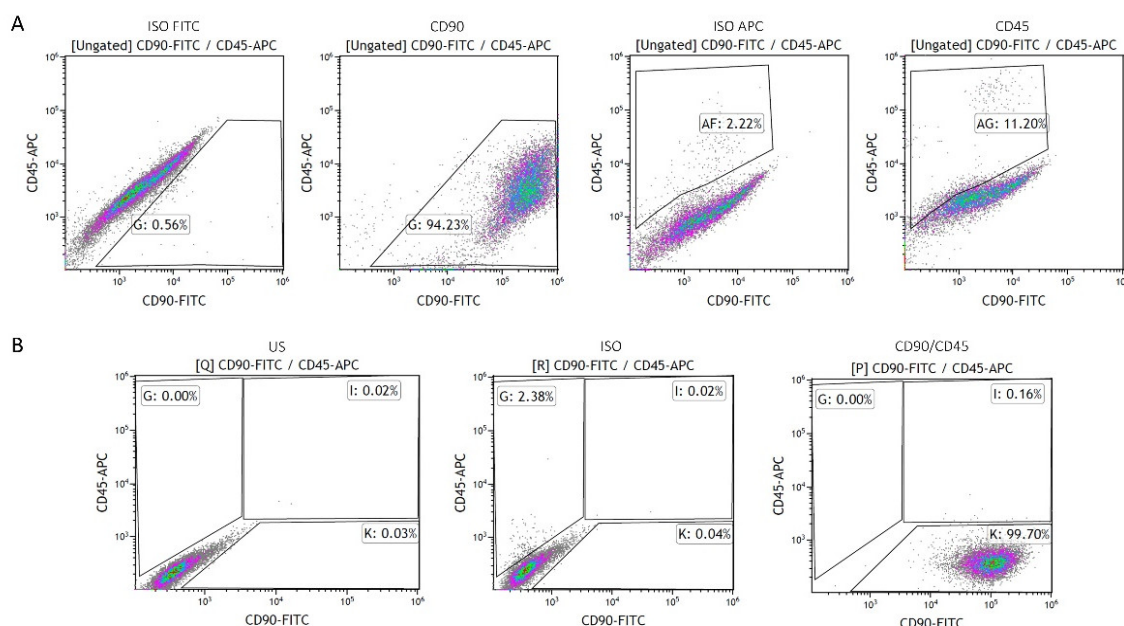

**Figure S1.** Mesenchymal stem cell (MSC) characterization following a hollow fiber-based bioreactor for cell culture. FACS analysis of CD90 and CD45 expression in P1 human adipose-derived MSCs. 94.23% of the isolated cells express the CD90 surface marker related to human MSCs. 11.2% of the isolated cells express the CD45 surface marker related to hematopoietic cells. Staining for nonspecific mouse immunoglobulin G (IgG) isotype fluorescence was used as a control (**A**). FACS analysis of human adipose-derived MSCs following cell growth in the bioreactor. 99.7% of the isolated cells express the CD90 surface marker related to human MSCs and are negative to CD45 surface marker related to hematopoietic cells. Incubation without antibodies was used as a negative control (US, unstained). Staining for nonspecific mouse IgG isotype fluorescence was used as a control (**B**).

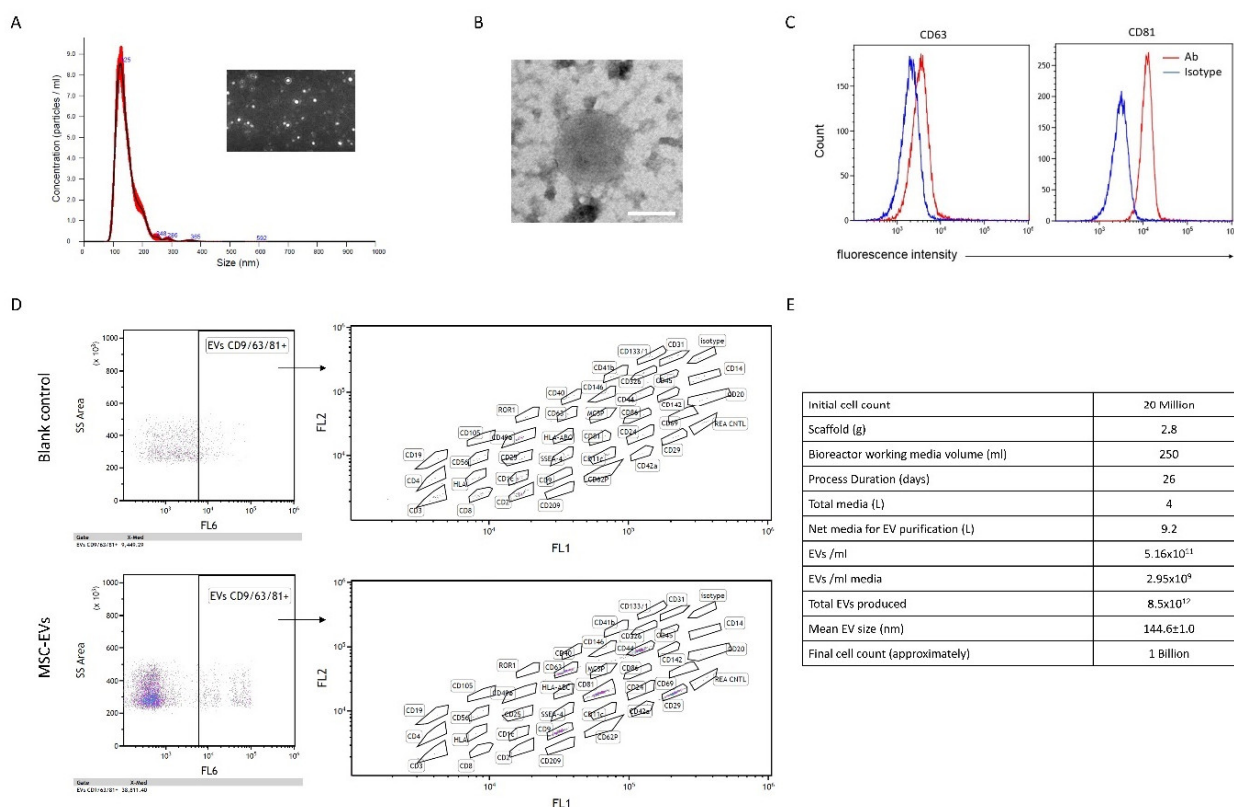

**Figure S2.** Mesenchymal stem cell-derived extracellular vesicle (MSC-EV) characterization following a hollow fiber-based bioreactor for cell culture. Nanoparticle tracking analysis (NTA) distribution profiles of MSC-EVs, including size distribution plot and mean size (A). Representative transmission electron microscopy (TEM) image of MSC-EVs (B). Scale bar = 100 nm. FACS analysis of EV expression of surface molecules (C). EVs were loaded onto 4- $\mu$ m-diameter aldehyde/sulfate latex beads and stained with CD63-APC or CD81-APC Abs (red lines) or negative control IgG1 Isotype Ab (blue line). MACSplex analysis, applied to determine EV origin by surface protein composition (D). Top panel- blank control; Bottom panel- MSC-EVs. (E) A data table summarizes parameters of EV production from cells cultured in a bioreactor.

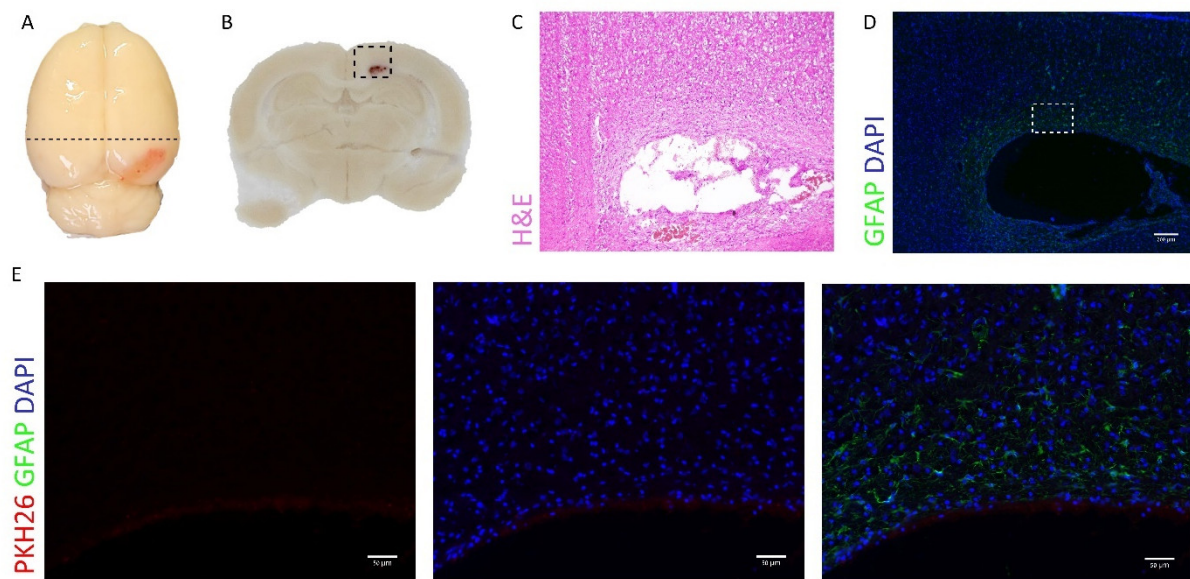

**Figure S3.** PKH26 fluorescent dye serves as a control for PKH26-labeled extracellular vesicle (EV) accumulation in lesion sites in brains of the SBH/y rat model of cerebral small vessel disease (CSVD). Representative images of brain derived from SBH/y DOCA rats following a single administration of PKH26 fluorescent dye (without EVs) (A). Dashed lines represent the coronal section presented in (B). 5x magnification of the injured area is presented using H&E (C) and GFAP immunostaining (D). Scale bar = 200  $\mu$ m. A magnification of the inset in (D) is presented in (E). Scale bar = 50  $\mu$ m.
